# Supplementary material
Source: PubMed Central journal article supplement (PMC2881793)
Supplement: supp_M110.110718_jbc.M110.110718-1.pdf [file supp_M110.110718_jbc.M110.110718-1.pdf]

A

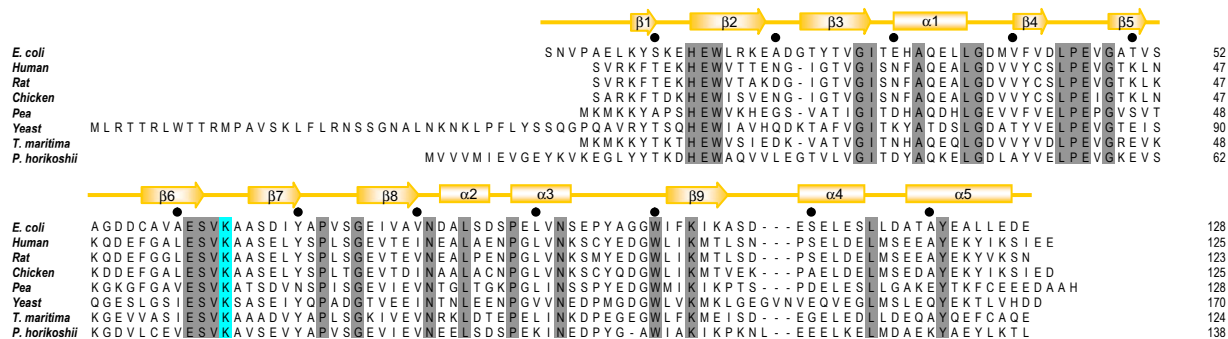

B

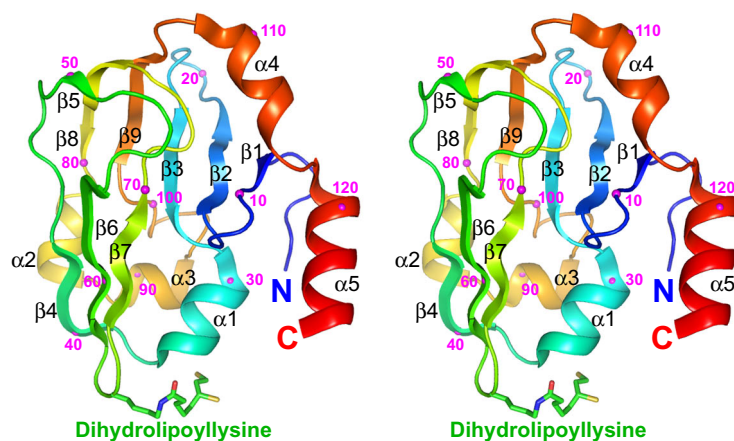

C

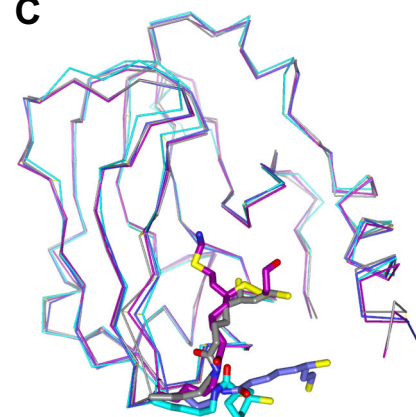

### Supplemental Figure S1. Structure of ecHred.

**A**, Sequence alignment of H-proteins from various species. The sequence of ecH (*E. coli*) was aligned with H-proteins from *Homo sapiens* (human), *Rattus norvegicus* (rat), *Gallus gallus* (chicken), *Pisum sativum* (pea), *Saccharomyces cerevisiae* (yeast), *Thermotoga maritima* MSB8 (*T. maritima*), and *Pyrococcus horikoshii* OT3 (*P. horikoshii*) using ClustalW2. The yeast sequence includes the mitochondrial targeting presequence. Identical residues and lysine residues to which lipoic acid is covalently attached are shaded in gray and cyan, respectively. Secondary structural elements of ecH are indicated above the alignment and every ten residues are marked with filled circles.

**B**, Stereoview of a cartoon representation of the structure of ecHred. The  $\alpha$ -helices,  $\beta$ -strands, and every ten residues are numbered and colored from blue to red from the N- to C-termini. The dihydrolipoyllysine is shown in stick.

**C**, Comparison of the structure of ecHred and peaH. Backbone structures of ecHred (cyan), peaH bearing aminomethyllypoilysine (purple) (PDB code 1HTP), and two molecules of peaH bearing dihydrolipoyllysine in an asymmetric unit (gray and light blue) (PDB code 1DXM) are superimposed.

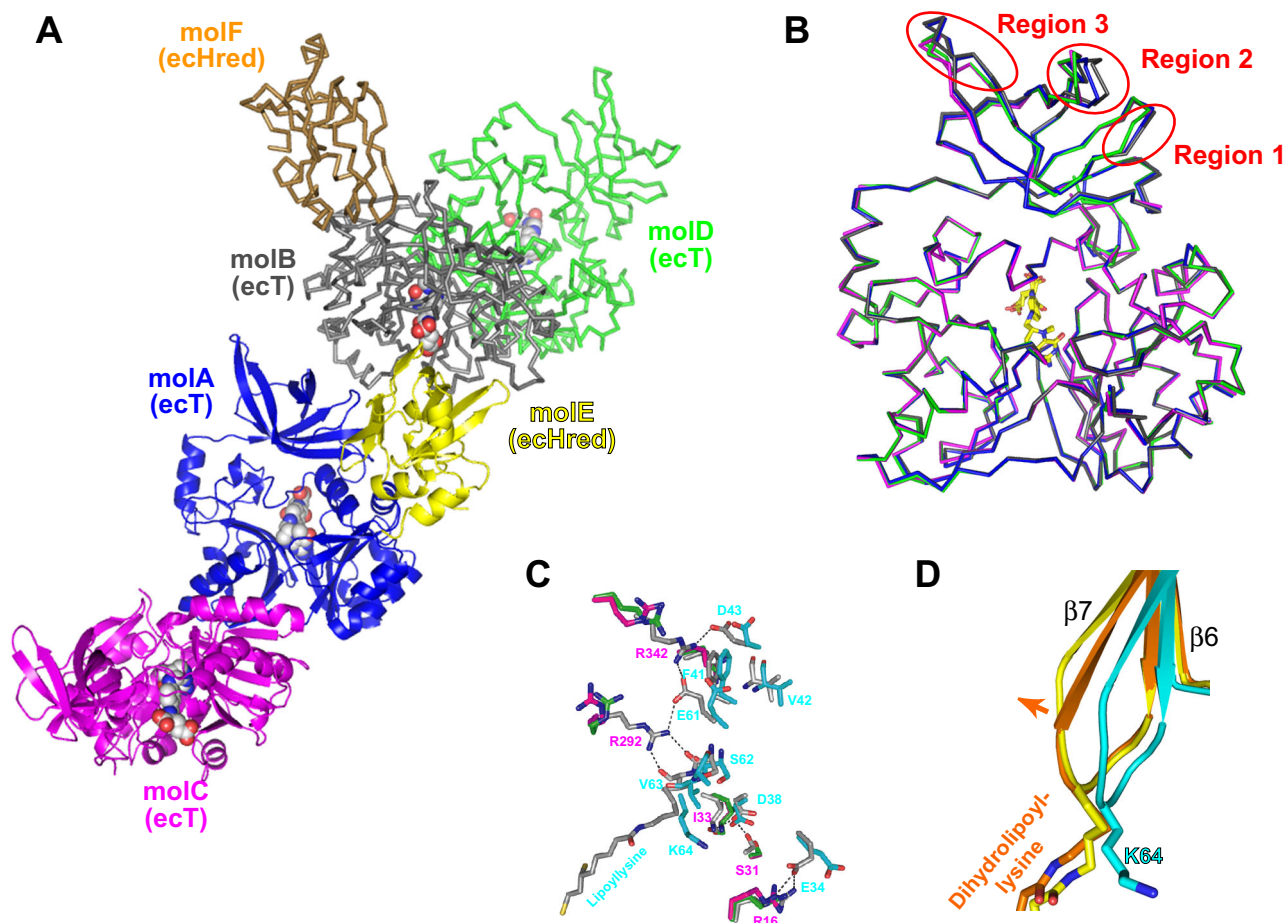

### Supplemental Figure S2. Structure of the ecT-ecHred complex.

**A**, Cartoon and ribbon representations of the four ecT molecules (molA, molB, molC, and molD) and two ecHred molecules (molE and molF) in an asymmetric unit. A heterotrimer comprising molA (blue), molC (magenta), and molE (yellow) is in cartoon representation, and the other one comprising molB (gray), molD (green), and molF (orange) is in ribbon form. Atoms of the bound 5-CH<sub>3</sub>-THF represented in CPK are colored in gray (carbon), blue (nitrogen), and red (oxygen).

**B**, Ribbon representation of the backbone superimposition of four ecT molecules in an asymmetric unit. Backbone colors are as in (A) and 5-CH<sub>3</sub>-THF is shown in stick colored in yellow. Pairwise structural comparisons gave r.m.s.d. ranging from 0.11 Å to 0.32 Å, with an average value of 0.23 Å. Three regions showing conformational changes upon ecHred binding are circled.

**C**, Superimposition of MolBF, MolC, MolD, and ecHred monomer. Residues from ecHred (labeled in cyan) and ecT (labeled in magenta) contributing to the heterodimer interface of molBF are compared with those in molC, molD and ecHred monomer, representing in stick with carbon atoms colored in gray, magenta, green, and cyan, respectively. Hydrogen bonds are depicted as broken lines.

**D**, Close-up view of the hairpin b-motif region of superimposed molE, molF, and ecHred monomer. The orange arrow indicates the conformational rearrangement of β7 upon binding to ecT.

A

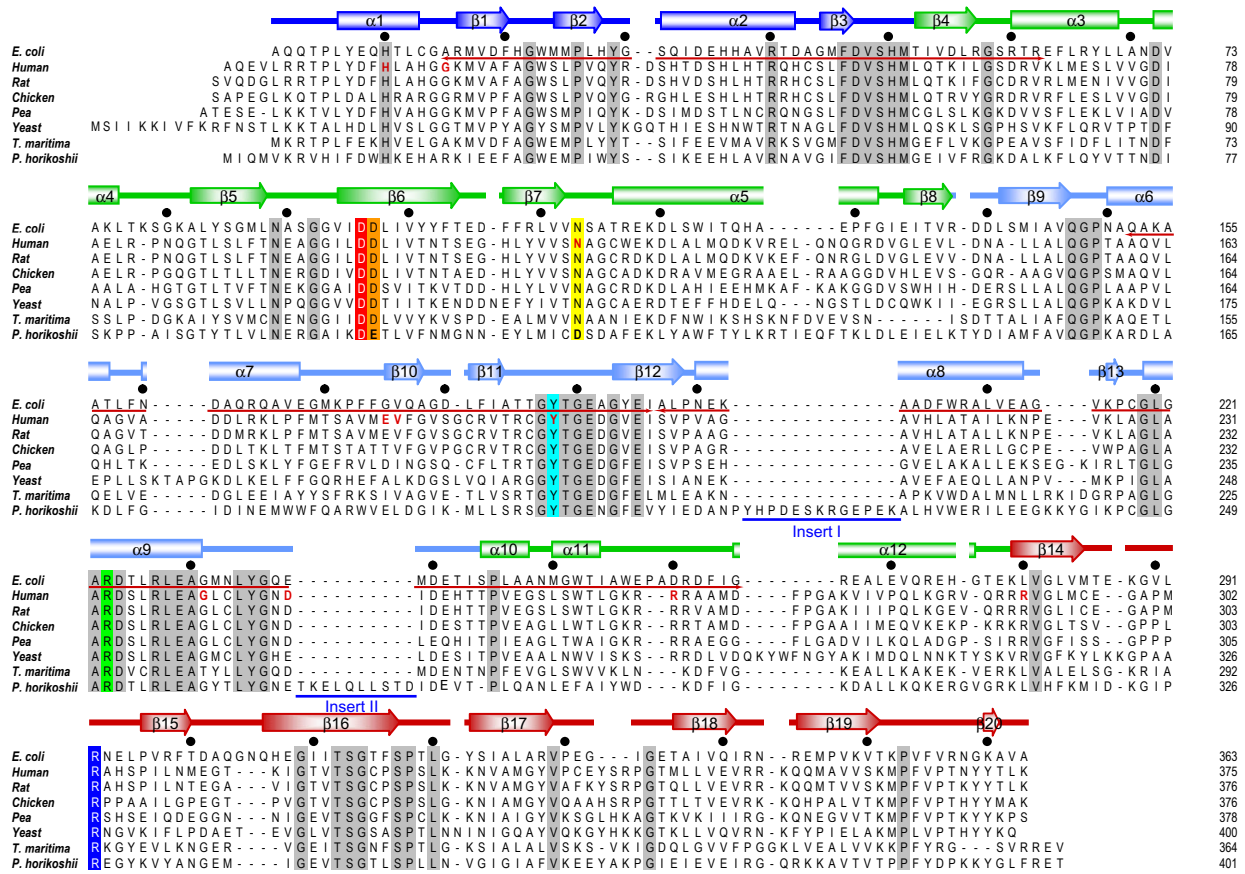

B

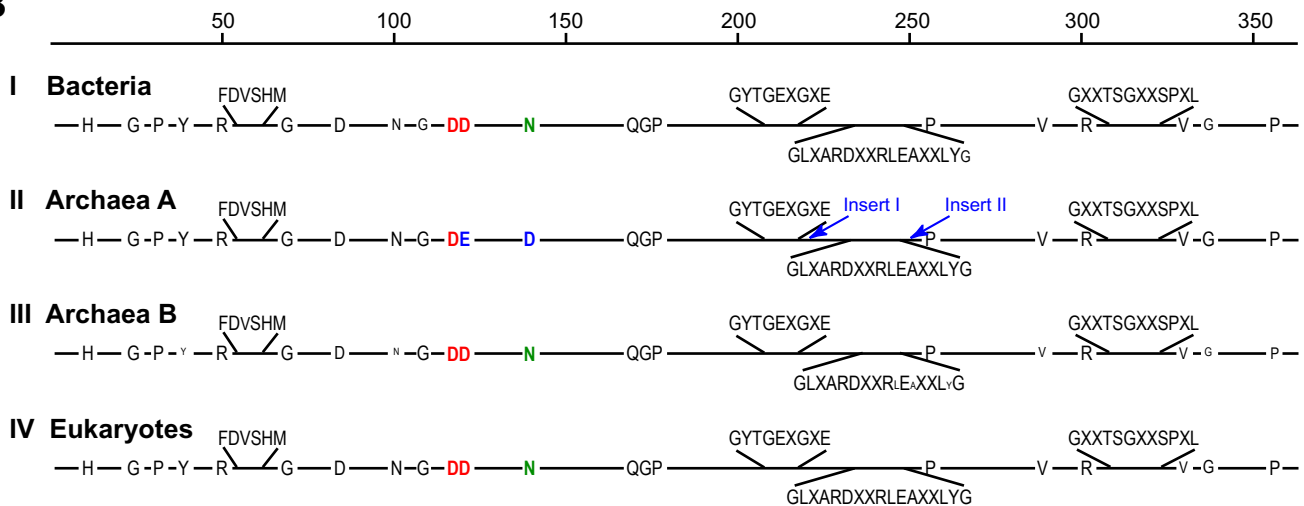

### Supplemental Figure S3. Sequence alignment of T-proteins.

A, Sequence alignment using ClustalW2 of ecT (*E. coli*) with T-proteins from *Homo sapiens* (human), *Rattus norvegicus* (rat), *Gallus gallus* (chicken), *Pisum sativum* (pea), *Saccharomyces cerevisiae* (yeast), *Thermotoga maritima* MSB8 (*T. maritima*), and *Pyrococcus horikoshii* OT3 (*P. horikoshii*). The yeast sequence includes the mitochondrial targeting presequence. Secondary structural elements of ecT are indicated above the alignment, and domain 1, 2, and 3 are colored in blue/lightblue, green, and red, respectively. Identical residues are shaded and NKH-related residues in human T-protein are in red. Residues subjected to mutation analysis are shaded in grey. The regions used as the training datasets for the HMM profiles are underlined in red.

B, Sequence comparison of T-proteins from 136 organisms. T-protein sequences are classified into four groups: I, bacteria (97 sequences); II, archaea A (6); III, archaea B (6), and IV, eukaryotes (27). T-proteins belonging to Archaea A have extra sequences as shown in *P. horikoshii* T-protein (insert I and II). *T. maritima* T-protein belongs to archaea B. The top line shows the residue number of ecT. Identical or highly conserved residues are shown in different size characters depending on diversity. The notable residues are shown in red, blue, and green.

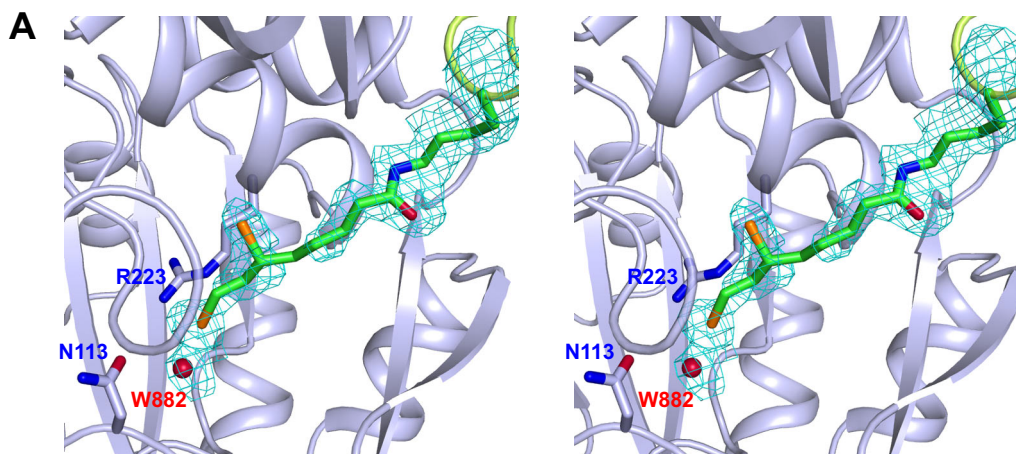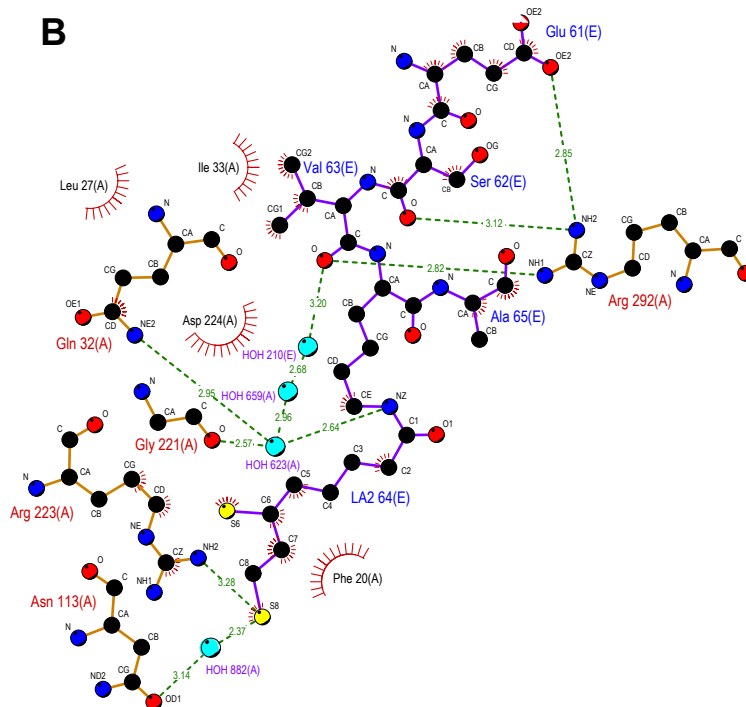

**Supplemental Figure S4. Structure of the dihydrolypoyllysine binding site in the molAE heterodimer.**

**A**, Stereoview of omit  $F_o-F_c$  electron density (in cyan) for dihydrolypoyllysine contoured at 1.6  $\sigma$ .

**B**, Schematic drawing of the interactions between dihydrolypoyllysine from ecH and surrounding residues in the active site. Atoms in dihydrolypoyllysine with short red lines are involved in hydrophobic interactions with the respective facing ecT residues also outlined with short red lines. Hydrogen bonds are represented by green broken lines with distances in  $\text{\AA}$ . (A) and (E) show molA and molE, respectively

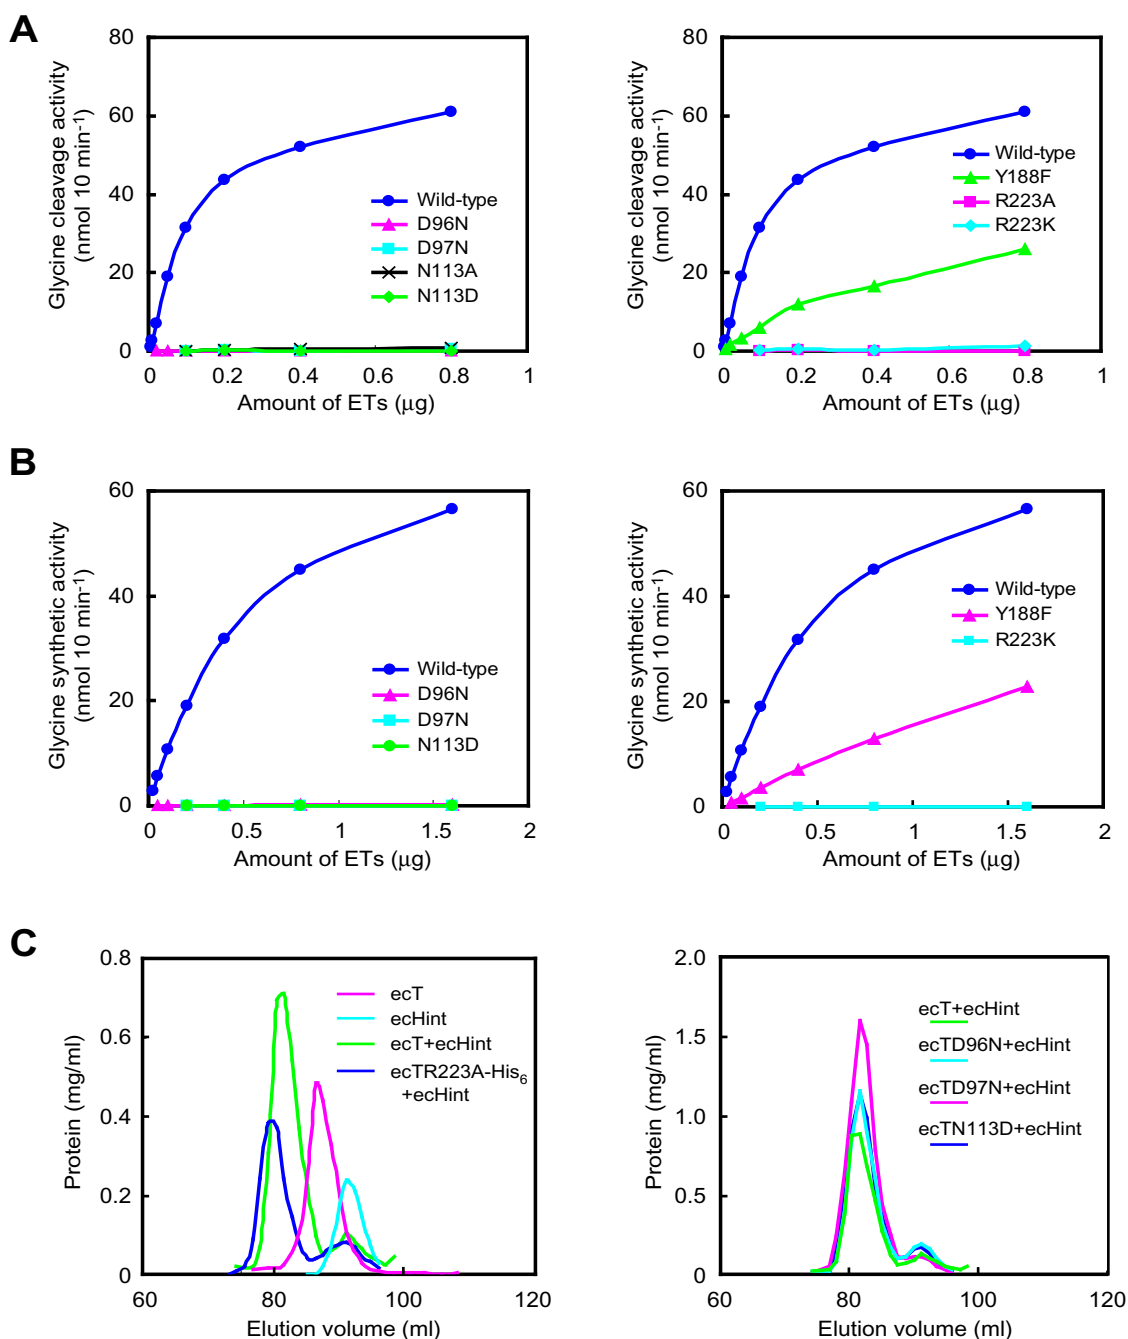

**Supplemental Figure S5. Mutational analysis of ecT residues in the active site.**

**A**, Glycine cleavage activity in the overall reaction in the presence of THF with saturating amounts of ecH, ecP, and L-protein. Limited amount of ecTs with C-terminal His<sub>6</sub>-tag (0-0.8 μg) were employed.

**B**, Glycine synthesis activity in overall reaction in the presence of 5,10-CH<sub>2</sub>-THF with saturated amounts of auxiliaries. ecTs with C-terminal His<sub>6</sub>-tag (0-1.6 μg) are employed.

**C**, Heterodimer forming ability of ecTs with ecHint. ecTs with or without C-terminal His<sub>6</sub>-tag were incubated with 1.2-1.5-fold molar excess of ecHint at 25 °C for 30 min, and subjected to gel-filtration column chromatography. All mutants formed heterodimers. Wild-type ecT with a C-terminal His<sub>6</sub>-tag was eluted a slight earlier than that without a His<sub>6</sub>-tag. This was also the case for the heterodimer comprising ecTR223A-His<sub>6</sub> and ecHint.

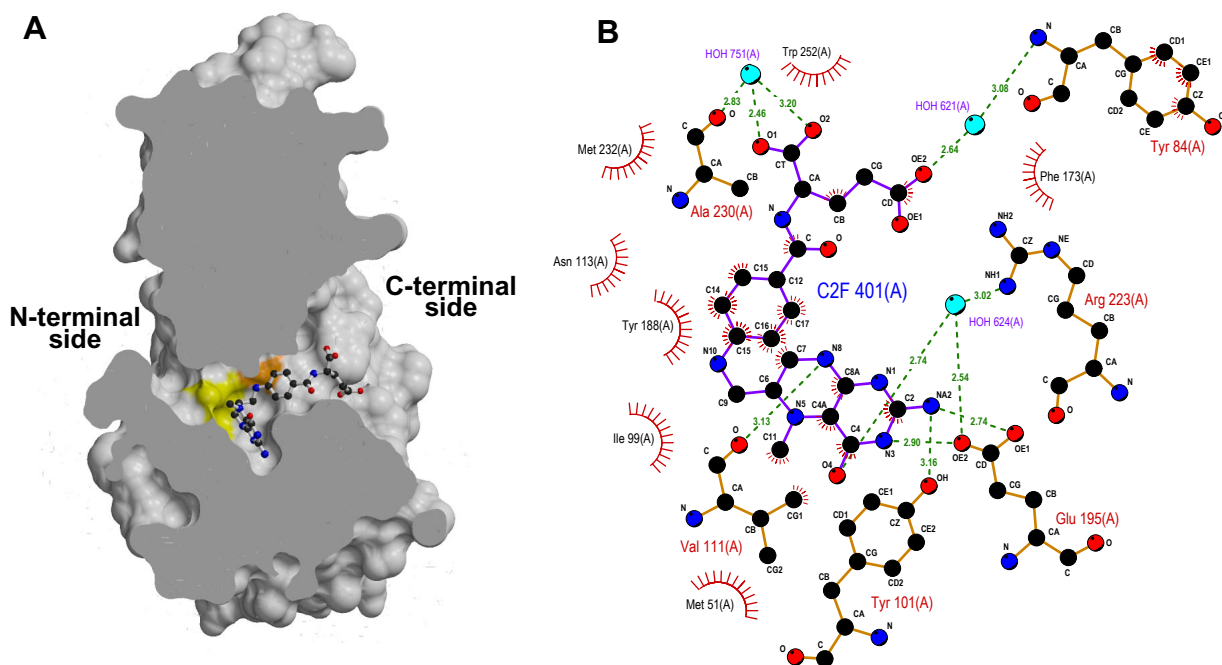

**Supplemental Figure S6. Structure of the 5-CH<sub>3</sub>-THF binding site in the molAE heterodimer structure.**

**A**, Cross-section of the molecular surface of ecT with bound 5-CH<sub>3</sub>-THF in stick form. The positions of Asp97 (orange) and Asn113 (yellow) of ecT are colored. Atom colors of the ligand are as in supplemental Fig. S2A.

**B**, Schematic drawing of the interactions between 5-CH<sub>3</sub>-THF and residues in ecT active site. Atoms in the ligand with short red lines are involved in hydrophobic interactions with the respective facing ecT residues also outlined with short red lines. Hydrogen bonds are represented by green broked lines with distances in Å. (A) shows molA.

**Supplemental Table S1. Data collection and refinement statistics**

|                                                                                   | ecHred                                   | ecT–ecHred               | ecT–ecHred–<br>5-CH <sub>3</sub> -THF | ecTD97N–ecHred           |
|-----------------------------------------------------------------------------------|------------------------------------------|--------------------------|---------------------------------------|--------------------------|
| <b>Data collection</b>                                                            |                                          |                          |                                       |                          |
| Space group                                                                       | <i>P</i> 4 <sub>3</sub> 2 <sub>1</sub> 2 | <i>P</i> 1               | <i>P</i> 1                            | <i>P</i> 1               |
| Cell dimensions                                                                   |                                          |                          |                                       |                          |
| <i>a</i> , <i>b</i> , <i>c</i> (Å)                                                | 60.3, 60.3, 68.6                         | 54.0, 88.5, 97.2         | 54.0, 88.9, 98.0                      | 54.1, 88.4, 97.9         |
| α, β, γ (°)                                                                       | 90, 90, 90                               | 91.5, 102.2, 89.7        | 91.5, 102.5, 89.6                     | 91.6, 102.4, 89.6        |
| Resolution (Å)                                                                    | 50.0-1.65<br>(1.67-1.65) <sup>a</sup>    | 50.0-1.98<br>(2.07-2.00) | 30.0-1.99<br>(2.07-1.99)              | 50.0-1.95<br>(1.98-1.95) |
| <i>R</i> <sub>merge</sub> <sup>b</sup>                                            | 5.5 (36.1)                               | 5.9 (34.6)               | 9.3 (37.9)                            | 7.1 (44.2)               |
| <i>I</i> / σ <i>I</i>                                                             | 79.8 (8.6)                               | 15.3 (2.4)               | 9.78 (2.86)                           | 20.9 (3.2)               |
| Completeness (%)                                                                  | 100.0 (100.0)                            | 98.0 (97.1)              | 85.1 (88.0)                           | 98.3 (97.4)              |
| Redundancy                                                                        | 14.1 (14.2)                              | 2.1 (2.1)                | 3.1 (2.9)                             | 4.0 (3.9)                |
| <b>Refinement</b>                                                                 |                                          |                          |                                       |                          |
| Resolution (Å)                                                                    | 20-1.65                                  | 44.4-1.98                | 29.8-1.99                             | 44.0-1.95                |
| No. reflections                                                                   | 14,972                                   | 112,820                  | 97,181                                | 119,927                  |
| <i>R</i> <sub>work</sub> <sup>c</sup> / <i>R</i> <sub>free</sub> <sup>d</sup> (%) | 20.4 / 21.6                              | 17.2 / 23.8              | 18.2 / 24.4                           | 17.1 / 22.9              |
| No. atoms                                                                         |                                          |                          |                                       |                          |
| Protein                                                                           | 968                                      | 13,251                   | 13,258                                | 119,927                  |
| Ligand/ion                                                                        | 0/2                                      | 0/0                      | 137/5                                 | 0/0                      |
| Water                                                                             | 46                                       | 1362                     | 1124                                  | 1495                     |
| <i>B</i> -factors (Å <sup>2</sup> )                                               |                                          |                          |                                       |                          |
| Protein                                                                           | 24.6                                     | 27.1                     | 23.9                                  | 24.6                     |
| Ligand/ion                                                                        | /26.5                                    |                          | 27.8/39.4                             |                          |
| Water                                                                             | 32.5                                     | 35.4                     | 31.3                                  | 33.9                     |
| r.m.s. deviations                                                                 |                                          |                          |                                       |                          |
| Bond lengths (Å)                                                                  | 0.022                                    | 0.022                    | 0.024                                 | 0.023                    |
| Bond angles (°)                                                                   | 1.991                                    | 1.799                    | 1.971                                 | 1.867                    |
| Ramachandran plot (%)                                                             |                                          |                          |                                       |                          |
| Favored                                                                           | 87.5                                     | 90.0                     | 88.6                                  | 90.2                     |
| Additional allowed                                                                | 11.6                                     | 9.2                      | 10.4                                  | 9.1                      |
| Generously allowed                                                                | 0.9                                      | 0.6                      | 0.5                                   | 0.4                      |
| Disallowed                                                                        | 0                                        | 0.1                      | 0.5                                   | 0.3                      |

<sup>a</sup>Values in parentheses are for the highest-resolution shell.

<sup>b</sup> $R_{\text{merge}} = \frac{\sum_j | \langle I(h) \rangle - I(h)_j |}{\sum_j \langle I(h) \rangle}$ , where  $\langle I(h) \rangle$  is the mean intensity of symmetry-equivalent reflections.

<sup>c</sup> $R_{\text{work}} = \frac{\sum |F_o - F_c|}{\sum F_o}$  for reflections of working set.

<sup>d</sup> $R_{\text{free}} = \frac{\sum |F_o - F_c|}{\sum F_o}$  for reflections of test set (5% of total unique reflections).

**Supplemental Table S2. The list of gcvT sequences engaged as the training datasets for the HMM profile construction**

| KEGG GENES entry name | organism                                                      | NCBI Gene ID |
|-----------------------|---------------------------------------------------------------|--------------|
| ath:AT1G11860         | <i>Arabidopsis thaliana</i>                                   | 837733       |
| cko:CKO_04269         | <i>Citrobacter koseri</i> ATCC BAA-895                        | 5584765      |
| cre:CHLREDRAFT_196242 | <i>Chlamydomonas reinhardtii</i>                              | 5718707      |
| dda:Dd703_3311        | <i>Dickeya dadantii</i>                                       | 8089258      |
| ddi:DDB_0231218       | <i>Dictyostelium discoideum</i> ,                             | 3386367      |
| eco:b2905             | <i>Escherichia coli</i> K-12 MG1655                           | 947390       |
| ent:Ent638_3324       | <i>Enterobacter</i> sp. 638                                   | 5111838      |
| hal:VNG1606G          | <i>Halobacterium</i> sp. NRC-1                                | 1448168      |
| hma:rrnAC1500         | <i>Haloarcula marismortui</i>                                 | 3127617      |
| hsa:275               | <i>Homo sapiens</i>                                           | 275          |
| kpe:KPK_0759          | <i>Klebsiella pneumoniae</i> 342                              | 6939543      |
| mmu:434437            | <i>Mus musculus</i>                                           | 434437       |
| nph:NP4774A           | <i>Natronomonas pharaonis</i>                                 | 3702746      |
| pho:PH1146            | <i>Pyrococcus horikoshii</i>                                  | 1443465      |
| plu:plu3598           | <i>Photorhabdus luminescens</i>                               | 2803610      |
| rno:306586            | <i>Rattus norvegicus</i>                                      | 306586       |
| sbc:SbBS512_E3326     | <i>Shigella boydii</i> CDC 3083-94                            | 6272620      |
| sce:YDR019C           | <i>Saccharomyces cerevisiae</i>                               | 851582)      |
| see:SNL254_A3290      | <i>Salmonella enterica</i><br>subsp. enterica serovar Newport | 6483955      |
| sgl:SG2002            | <i>Sodalis glossinidius</i>                                   | 3867083      |
| tac:Ta0010m           | <i>Thermoplasma acidophilum</i>                               | 1456956      |
| yen:YE3393            | <i>Yersinia enterocolitica</i>                                | 4713786      |
